# Supplementary material for: The Efficiency of Gene Electrotransfer in Breast-Cancer Cell Lines Cultured on a Novel Collagen-Free 3D Scaffold
Source: Cancers (Basel). 2020 Apr 23;12(4):1043. doi: 10.3390/cancers12041043 (PMC7226458; doi:10.3390/cancers12041043)
Supplement: Supplementary file 1 [file cancers-12-01043-s001.pdf]

# Supplementary Material: The Efficiency of Gene Electrotransfer in Breast-Cancer Cell Lines Cultured on a Novel Collagen-Free 3D Scaffold

Elisabetta Sieni, Monica Dettin, Mariangela De Robertis, Bianca Bazzolo, Maria Teresa Conconi, Annj Zamuner, Ramona Marino, Flavio Keller, Luca Giovanni Campana and Emanuela Signori

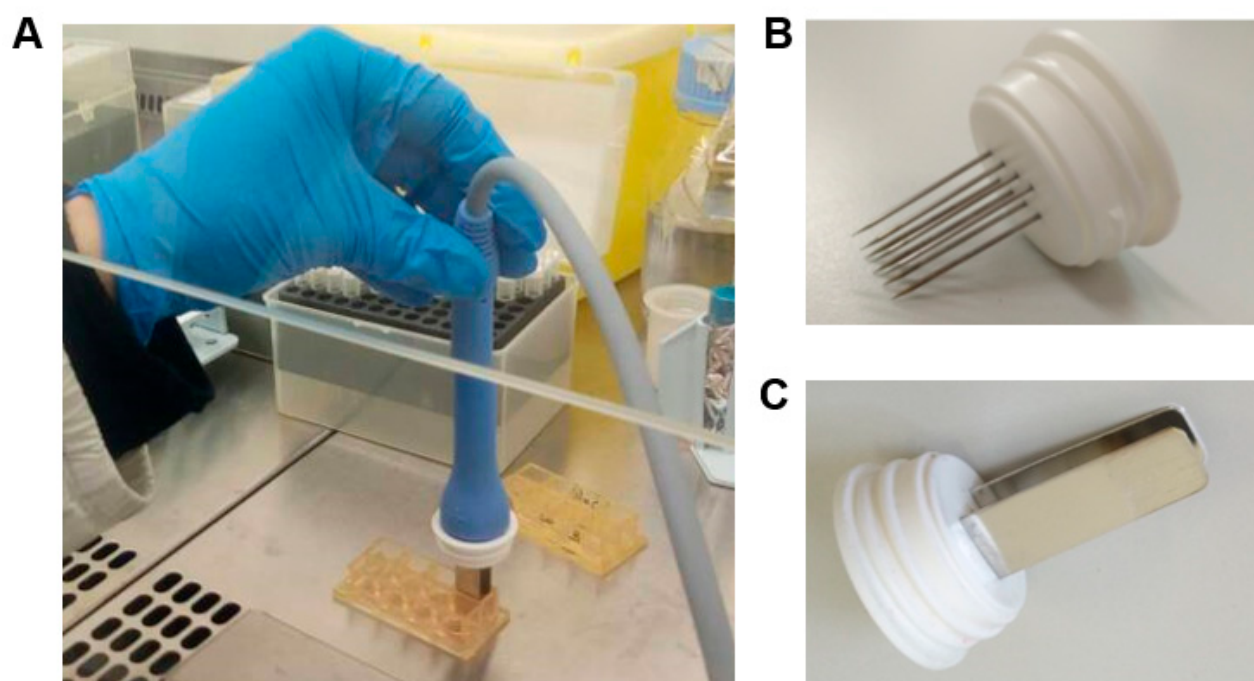

**Figure S1.** Representative images of electroporation procedure in 8-well chamber slides (A) using linear (B) or plate (C) electrodes.

**Table S1. GET efficiency after two GET protocols in 2D and 3D cell cultures.** Percentage of cell transfection of HCC1954 (A) and MDA-MB231 (B) cell lines in 2D and 3D cultures measured three days after EP (with a linear or plate electrode).

| <b>A</b>                      |                    | <b>HCC1954</b>      |  |                   |
|-------------------------------|--------------------|---------------------|--|-------------------|
|                               | <b>2D</b>          | <b>3D</b>           |  |                   |
| GET protocol—Linear Electrode | 20% ( $\pm 2,47$ ) | 12% ( $\pm 2,60$ )  |  | $p < 0.01$        |
| GET protocol—Plate Electrode  | 15% ( $\pm 2,16$ ) | 44% ( $\pm 12,48$ ) |  | $p < 0.01$        |
|                               | $p = \text{n.s.}$  | $p < 0.0001$        |  |                   |
| <b>B</b>                      |                    | <b>MDA-MB231</b>    |  |                   |
|                               | <b>2D</b>          | <b>3D</b>           |  |                   |
| GET protocol—Linear Electrode | 13% ( $\pm 1,02$ ) | 11% ( $\pm 4,32$ )  |  | $p = \text{n.s.}$ |
| GET protocol—Plate Electrode  | 17% ( $\pm 2,12$ ) | 24% ( $\pm 2,16$ )  |  | $p < 0.01$        |
|                               | $p = \text{n.s.}$  | $p < 0.01$          |  |                   |

Data are from two independent experiments and are displayed as Mean  $\pm$  SD. Statistically significant differences are calculated using Student's *t*-test. Abbreviations: n.s, not significant.

**Table S2. Cell viability after two GET protocols in 2D and 3D cell cultures.** Viability of HCC1954 (A) and MDA-MB231 (B) 2D and 3D cell culture after three days post-GET using linear or plate electrodes. Percentage viability obtained using PrestoBlue™ Cell Viability assay. Control: untreated cells.

| <b>A</b>                      |                    | <b>HCC1954</b>      |                   |
|-------------------------------|--------------------|---------------------|-------------------|
|                               | <b>2D</b>          | <b>3D</b>           |                   |
| GET protocol—Linear Electrode | 81% ( $\pm 4,13$ ) | 81% ( $\pm 8,34$ )  | $p = \text{n.s.}$ |
| GET protocol—Plate Electrode  | 53% ( $\pm 1,28$ ) | 66% ( $\pm 2,30$ )  | $p = \text{n.s.}$ |
|                               | $p < 0.0001$       | $p < 0.01$          |                   |
| <b>B</b>                      |                    | <b>MDA-MB231</b>    |                   |
|                               | <b>2D</b>          | <b>3D</b>           |                   |
| GET protocol—Linear Electrode | 65% ( $\pm 0,87$ ) | 86% ( $\pm 10,60$ ) | $p < 0.01$        |
| GET protocol—Plate Electrode  | 63% ( $\pm 3,51$ ) | 96% ( $\pm 5,24$ )  | $p < 0.0001$      |
|                               | $p = \text{n.s.}$  | $p = \text{n.s.}$   |                   |

Data are from quadruplicate biological repeats and are displayed as Mean  $\pm$  SD. Statistically significant differences are calculated using Student's *t*-test. Abbreviations: n.s, not significant.
